# Supplementary material for: Evaluation of perfluoropropane (C3F8)-filled chitosan polyacrylic acid nanobubbles for ultrasound imaging of sentinel lymph nodes and tumors
Source: Royal Society of Chemistry journal article supplement (doi:10.1039/d2bm01140a), 2022-01-01
Supplement: d2bm01140a1.pdf [file d2bm01140a1.pdf]

## Supporting Information

### Evaluation of Perfluoropropane ( $C_3F_8$ )-Filled Chitosan Poly-Acrylic Acid Nanobubbles for Ultrasound Imaging of Sentinel Lymph Nodes and Tumors

Yi Lin, Ju Huang, Yinyin Chen, Ziwei Wen, Yang Cao, Liang Zhang, Tao Cai,  
Chaoqun Yu\* and Xuemei He\*

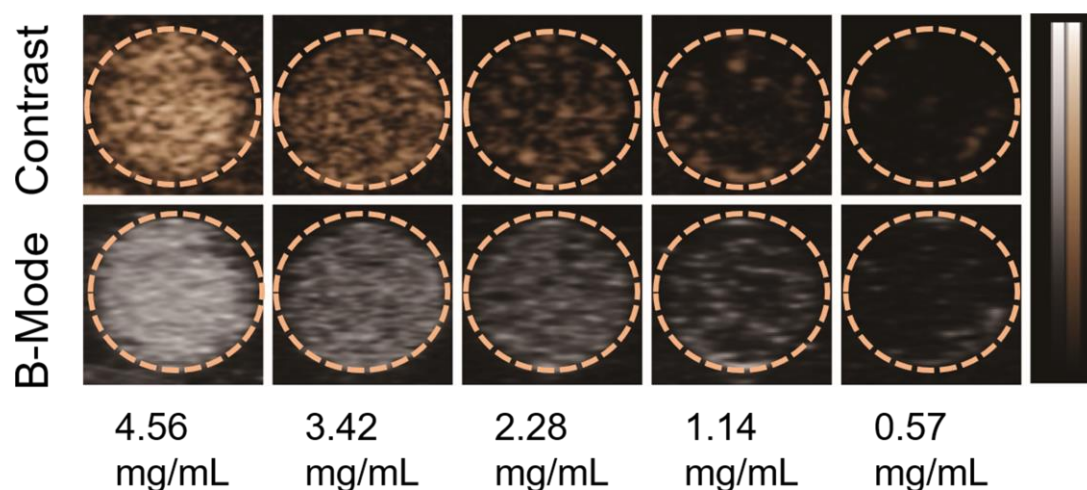

**Fig. S1** In vitro ultrasound image enhancement. Ultrasound images of an agar gel phantom containing  $C_3F_8$ -CS-PAA NBs at concentration ranging from 0.57 to 4.56 mg/mL. Images were acquired at B-mode and contrast mode, as indicated.

**Table S1** Design of hemolysis assay

|                                          | Group numbers |     |     |     |     |     |
|------------------------------------------|---------------|-----|-----|-----|-----|-----|
|                                          | 1             | 2   | 3   | 4   | 5   | 6   |
| C <sub>3</sub> F <sub>8</sub> -CS-PAA/mL | 0.1           | 0.2 | 0.3 | 0.4 | -   | -   |
| NS/mL                                    | 2.4           | 2.3 | 2.2 | 2.1 | 2.5 | -   |
| H <sub>2</sub> O/mL                      | -             | -   | -   | -   | -   | 2.5 |
| 2% RBC/mL                                | 2.5           | 2.5 | 2.5 | 2.5 | 2.5 | 2.5 |

**Abbreviations:** NS, normal saline; RBC, red blood cell; C<sub>3</sub>F<sub>8</sub>-CS-PAA, Perfluoropropane (C<sub>3</sub>F<sub>8</sub>)-Filled Chitosan Poly-Acrylic Acid; –, not applicable.

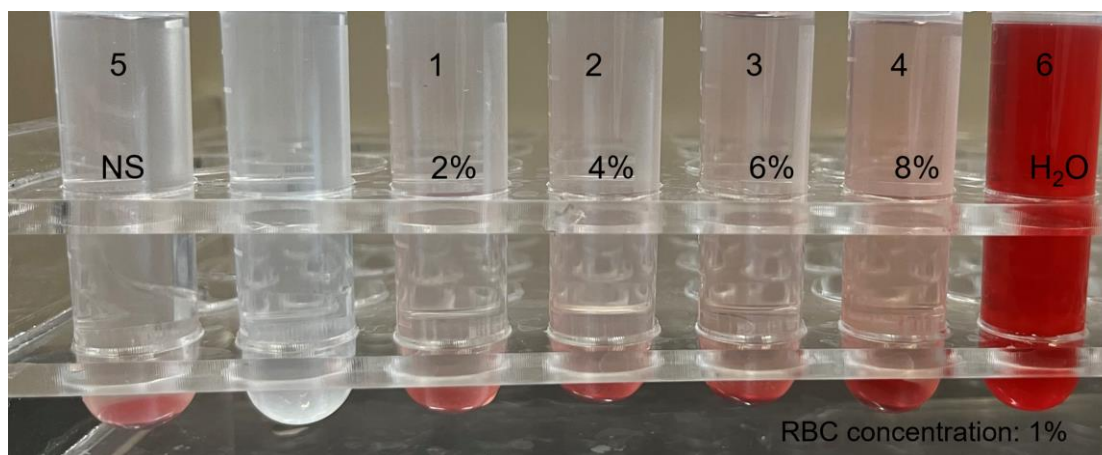

**Fig. S2** The hemolysis image of C<sub>3</sub>F<sub>8</sub>-CS-PAA (1-4: different concentrations of C<sub>3</sub>F<sub>8</sub>-CS-PAA, 5: NS, 6: deionized water).

**Abbreviations:** NS, normal saline; RBC, red blood cell; C<sub>3</sub>F<sub>8</sub>-CS-PAA, Perfluoropropane (C<sub>3</sub>F<sub>8</sub>)-Filled Chitosan Poly-Acrylic Acid.

**Table S2** Hemolysis ratio of the C<sub>3</sub>F<sub>8</sub>-CS-PAA at different concentrations

|                                                         | Group numbers |      |      |      |
|---------------------------------------------------------|---------------|------|------|------|
|                                                         | 1             | 2    | 3    | 4    |
| C <sub>3</sub> F <sub>8</sub> -CS-PAA concentration (%) | 2             | 4    | 6    | 8    |
| HR (%)                                                  | 0.20          | 0.69 | 1.69 | 4.86 |

**Abbreviations:** HR, hemolysis ratio; C<sub>3</sub>F<sub>8</sub>-CS-PAA, Perfluoropropane (C<sub>3</sub>F<sub>8</sub>)-Filled Chitosan Poly-Acrylic Acid.

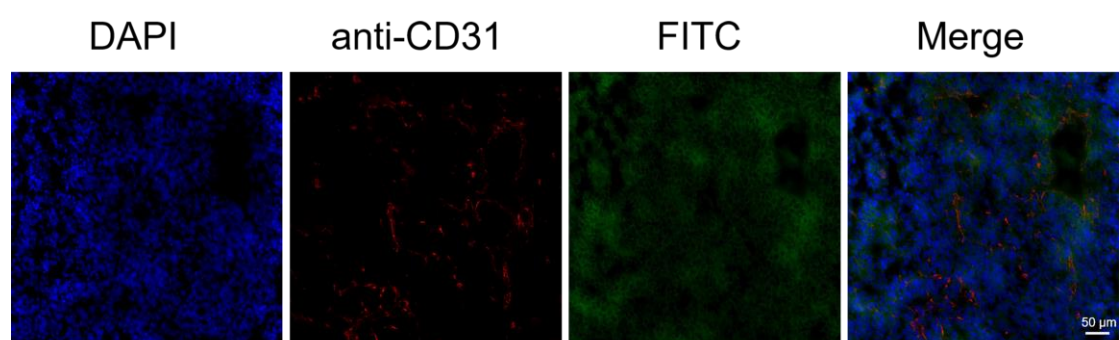

**Fig. S3** Confocal images of tumor slices collected from mice 1 h post-injection of FITC-labeled C<sub>3</sub>F<sub>8</sub>-CS-PAA NBs. The green and red signals were from the fluorescence of FITC and anti-CD31-stained blood vessels, respectively.
